# Supplementary material for: Morphological and Transcriptomic Analysis of the Inhibitory Effects of Lactobacillus plantarum on Aspergillus flavus Growth and Aflatoxin Production
Source: MDPI journal article supplement (doi:10.3390/toxins11110636), 2019-11-01
Supplement: s1 [file s1]

# Supplementary Materials: Morphological and Transcriptomic Analysis of the Inhibitory Effects of *Lactobacillus plantarum* on *Aspergillus flavus* Growth and Aflatoxin Production

Yueju Zhao, Chenxi Zhang, Yawa Minnie Elodie Folly, Jinghua Chang, Yan Wang, Lu Zhou and Heping Zhang and Yang Liu

Table S2. The gene specific primers of qRT-PCR.

| Gene name <sup>a</sup> | Primer Name    | Primer sequence (5'-3') | Product size (bp) |
|------------------------|----------------|-------------------------|-------------------|
| 18S RNA                | 18S RNA-F      | TGACAATGGGCTCAGAGGATG   | 95 bp             |
|                        | 18S RNA-R      | TTTCGCTAAGTCTCTCGCCAG   |                   |
| <i>aflD</i>            | <i>aflD</i> -F | ATGCTCCCGTCCTACTGTTT    | 106 bp            |
|                        | <i>aflD</i> -R | ATGTTGGTGATGGTGCTGAT    |                   |
| <i>aflG</i>            | <i>aflG</i> -F | TAACCTCCATCGTCCCGAAGAG  | 142bp             |
|                        | <i>aflG</i> -R | CATTTCACGTAGGCTAGCTGTC  |                   |
| <i>aflI</i>            | <i>aflI</i> -F | CACAACCAACGGGCTACAGAC   | 218 bp            |
|                        | <i>aflI</i> -R | TATTTTCTCCCTCAAACGAGCC  |                   |
| <i>aflK</i>            | <i>aflK</i> -F | GCTGGGCATTCCAGTACGAT    | 114 bp            |
|                        | <i>aflK</i> -R | CCCATCAACTGACTGTGGCT    |                   |
| <i>aflR</i>            | <i>aflR</i> -F | AGTGAAGTGCACCGAGTCCAG   | 116 bp            |
|                        | <i>aflR</i> -R | AGTAGTGAGAAAGGGGACGCTG  |                   |
| <i>catA</i>            | <i>catA</i> -F | CGACGATGTTTGACGCTACCT   | 231 bp            |
|                        | <i>catA</i> -R | CAGCCGTGACAACACCATAACC  |                   |
| 7910898                | 7910898-F      | AAGCAATCGGACTGTCCAACC   | 171 bp            |
|                        | 7910898-R      | GCCCTTTTCCCACTCATCGT    |                   |
| 7912413                | 7912413-F      | GGCCTGTGGATACCAAACCA    | 168 bp            |
|                        | 7912413-R      | TAGTAGGGGTTCTGCTTGACGC  |                   |

<sup>a</sup> 7910898 (GeneID) encodes a class V chitinase Chi100; 7912413 (GeneID) encodes a putative extracellular endoglucanase/cellulase.
